# Supplementary material for: Highly dispersed palladium nanoparticles generated in situ on layered double hydroxide nanowalls for ultrasensitive electrochemical detection of hydrazine
Source: Royal Society of Chemistry journal article supplement (doi:10.1039/c7ay02324c), 2017-01-01
Supplement: c7ay02324c1.pdf [file c7ay02324c1.pdf]

## Supporting Information

### **Highly dispersed palladium nanoparticles generated in situ on layered double hydroxide nanowalls for ultrasensitive electrochemical detection of hydrazine**

Liang Xu, Zongkai Qu, Jun Chen, Xu Chen,\* Feng Li and Wensheng Yang\*

State Key Laboratory of Chemical Resource Engineering, Beijing University of  
Chemical Technology, Beijing 100029, China

\*Corresponding Author. Tel.: +86 10 64435271; fax. +86 10 64425285.

*E-mail address:* chenxu@mail.buct.edu.cn (X. Chen)

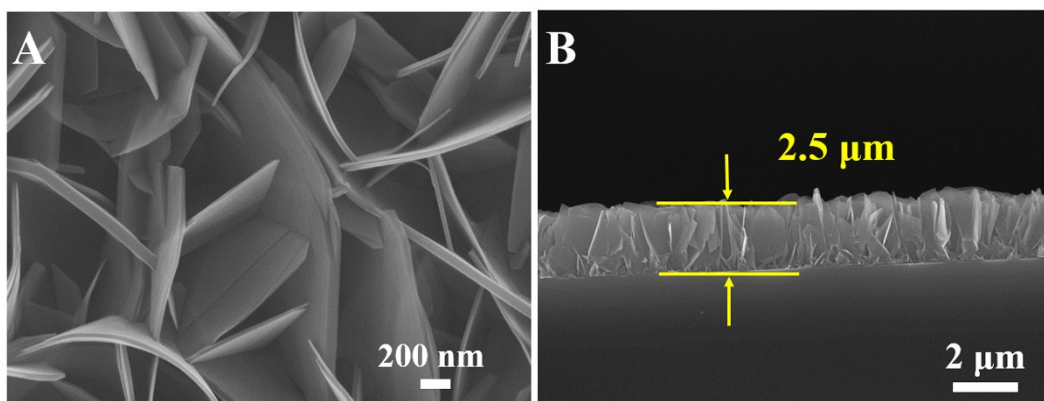

**Fig. S1** (A) SEM image of the CoAl-LDHNWs at high magnification. (B) A typical cross-sectional SEM image of the CoAl-LDHNWs.

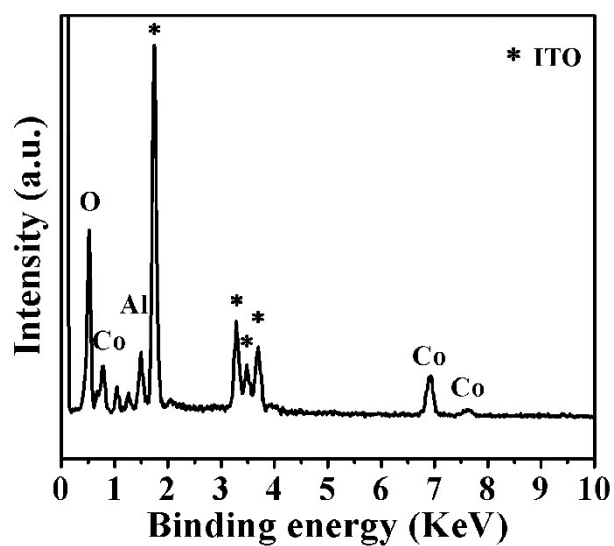

| Samples        | Element | Wt%   | At%   |
|----------------|---------|-------|-------|
| CoAl-LDHNW/ITO | O K     | 76.89 | 90.97 |
|                | Al K    | 4.24  | 2.98  |
|                | Co K    | 18.87 | 6.05  |

**Fig. S2** The EDS results of CoAl-LDHNW/ITO sample.

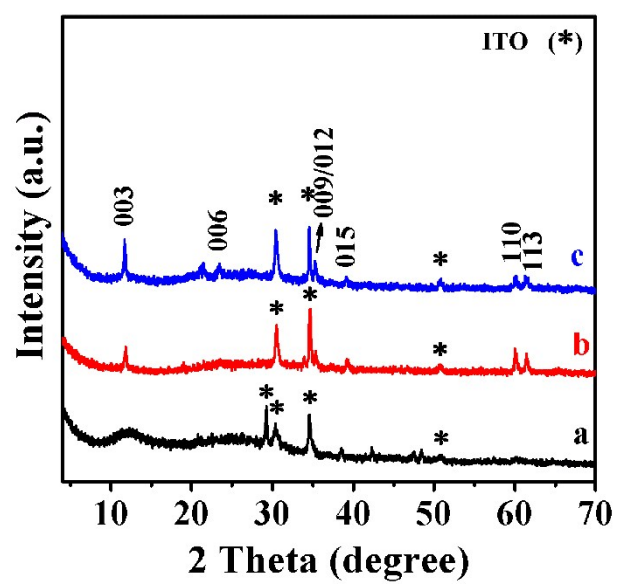

**Fig. S3** The XRD patterns of the (a) bare ITO substrate, (b) CoAl-LDHNW/ITO, and (c) CoAl-LDHs powder.

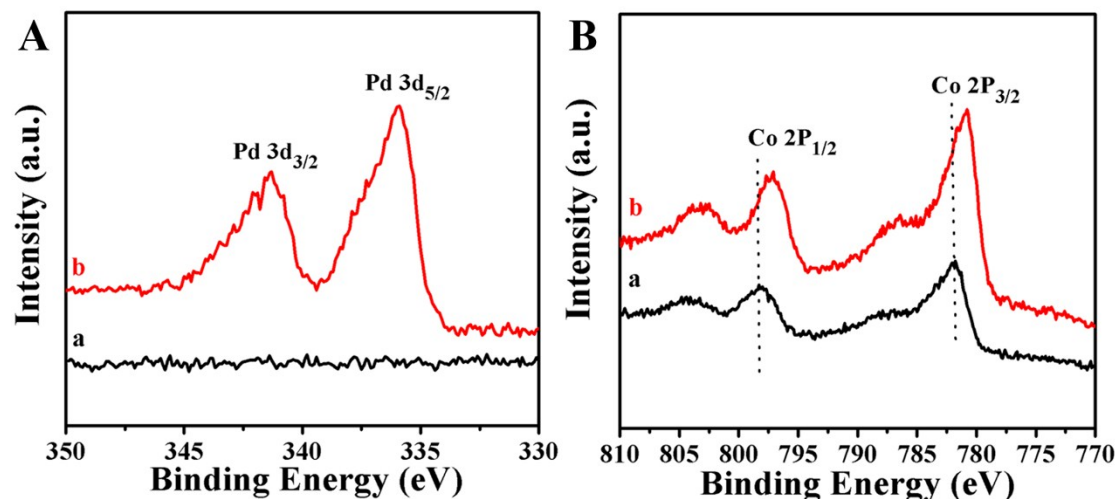

**Fig. S4** The XPS spectra of (A) Pd 3d and (B) Co 2p in (a) CoAl-LDHNWs and (b) PdNP/CoAl-LDHNW composite samples.

X-ray photoelectron spectroscopy (XPS) was employed to further study the surface characterization of the PdNP/CoAl-LDHNW composite and CoAl-LDHNWs. From curve b of Fig. S4A, Pd 3d<sub>5/2</sub> and Pd 3d<sub>3/2</sub> of the metallic Pd(0) state were observed at the binding energies of 336.0 and 341.5 eV, respectively, indicating the presence of metallic Pd.<sup>1</sup> Fig. S4B shows the Co 2p XPS spectrum of CoAl-LDHNWs, which exhibits two typical Co 2p<sub>3/2</sub> and Co 2p<sub>1/2</sub> peaks at 782.0 eV and 797.8 eV, respectively.<sup>2</sup> The presence of the satellite bands originated from a high-spin Co<sup>2+</sup> state in CoAl-LDHs. While the Co 2p<sub>3/2</sub> and Co 2p<sub>1/2</sub> peaks of PdNP/CoAl-LDHNW composite slightly shifted to lower energy levels (780.8 and 797.1 eV, respectively), which demonstrates Co<sup>2+</sup> in CoAl-LDHNWs was oxidized to Co<sup>3+</sup> when mixing with PdCl<sub>4</sub><sup>2-</sup>.<sup>3</sup> All XPS results suggested that PdCl<sub>4</sub><sup>2-</sup> could be in situ reduced by Co<sup>2+</sup> in CoAl-LDHNWs and form Pd nanoparticles on the layers of CoAl-LDHNWs.

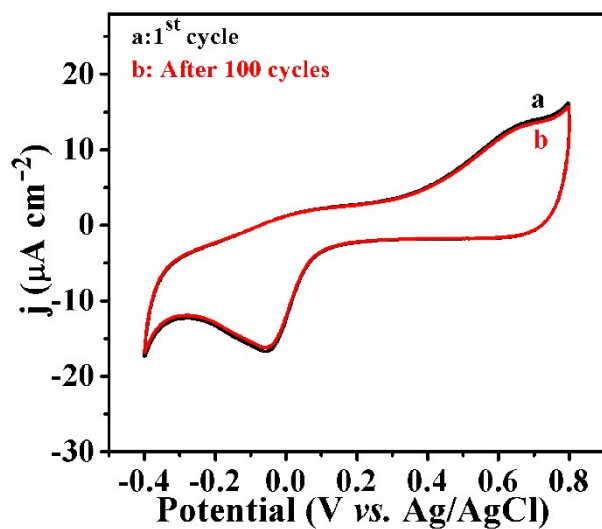

**Fig. S5** CVs of the PdNP/CoAl-LDHNW/ITO electrode in 0.1 M phosphate buffer solution (pH 7.0) at  $100 \text{ mV s}^{-1}$  before and after continuous 100 cycles.

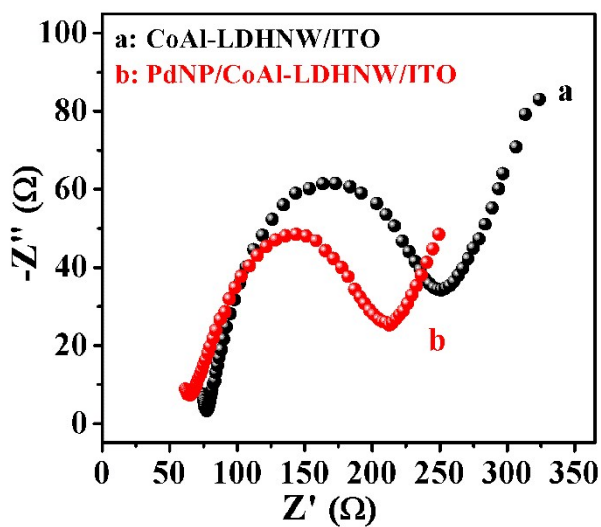

**Fig. S6** Nyquist plots of the CoAl-LDHNW/ITO (a) and PdNP/CoAl-LDHNW/ITO electrodes (b) in 5.0 mM  $[\text{Fe}(\text{CN})_6]^{3-/4-}$  containing 0.1 M KCl in the frequency range of 0.1–10 kHz with an AC voltage of 5 mV.

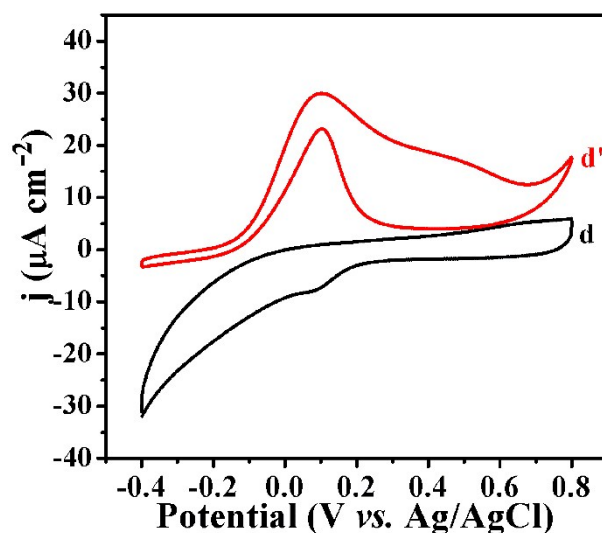

**Fig. S7** CVs of PdNP/CoAl-LDH power-modified ITO electrode in 0.1 M phosphate buffer solution (pH 7.0) in the absence (d) and presence (d') of 0.5 mM hydrazine at  $100 \text{ mV s}^{-1}$ .

The PdNP/CoAl-LDHs power were obtained by scraping from the PdNP/CoAl-LDHNW/ITO substrate ( $1 \text{ cm} \times 1 \text{ cm}$ ). Then the power was dispersed in  $150 \text{ }\mu\text{L}$  of deionized water and sonicated for  $\sim 20 \text{ min}$  to form a homogeneous suspension. The PdNP/CoAl-LDH power-modified ITO electrode was prepared by casting all the  $150 \text{ }\mu\text{L}$  of the LDH suspension on the surface of clean ITO electrode, and dried at room temperature.

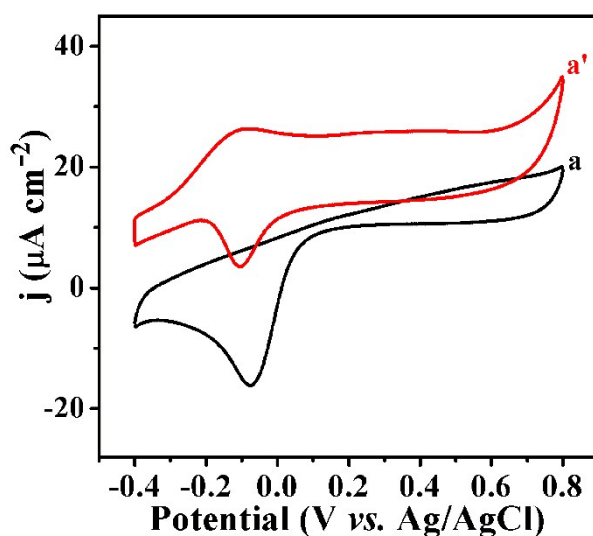

**Fig. S8** CVs of the PdNP/ITO electrode in 0.1 M phosphate buffer solution (pH 7.0) in the absence (a) and presence (a') of 0.5 mM hydrazine at 100 mV s<sup>-1</sup>.

The sample of pristine PdNPs was prepared by dissolving the PdNP/CoAl-LDHNW in 10 wt% hydrochloric acid (HCl) solution to remove the LDH support. Then, the PdNPs (washed 3 times with water) was dropped on the ITO electrode again and dried at room temperature, denoted as the PdNP/ITO. The electrocatalytic oxidation performance of the PdNP/ITO electrode toward hydrazine was studied. As shown in Fig. S8, the oxidation peak current intensity of the PdNP/ITO electrode was about 20  $\mu\text{A cm}^{-2}$  for 0.5 mM hydrazine, which was much lower than 85  $\mu\text{A cm}^{-2}$  obtained from the PdNP/CoAl-LDHNW/ITO electrode. This result indicates that the presence of LDHNW as support is important for the improved hydrazine sensing performance.

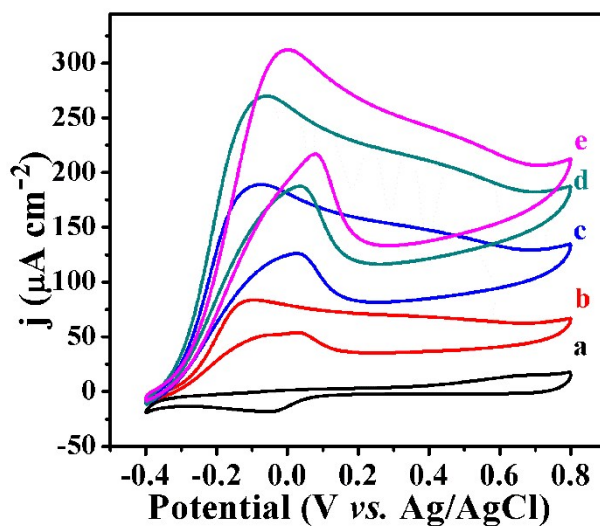

**Fig. S9** CVs of PdNP/CoAl-LDHNW/ITO electrode in 0.1 M phosphate buffer solution (pH 7.0) with various hydrazine concentrations (a, 0 mM; b, 0.5 mM; c, 1.0 mM; d, 1.5 mM and e, 2.0 mM) at 100 mV s<sup>-1</sup>.

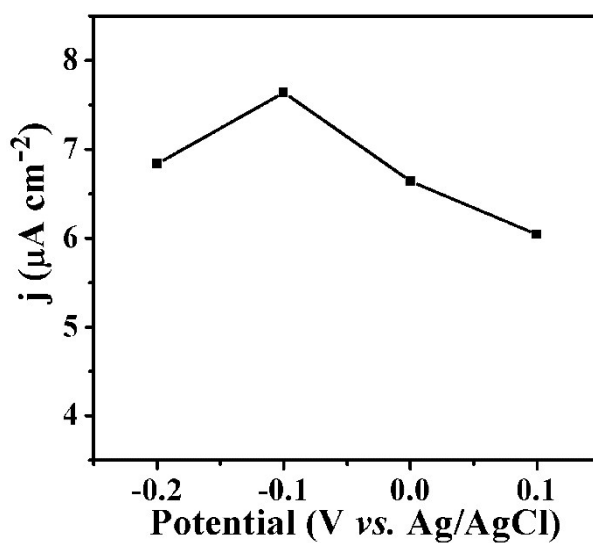

**Fig. S10** Effect of applied potential for PdNP/CoAl-LDHNW/ITO electrode with the response of 50 μM hydrazine in 0.1 M phosphate buffer solution (pH 7.0).



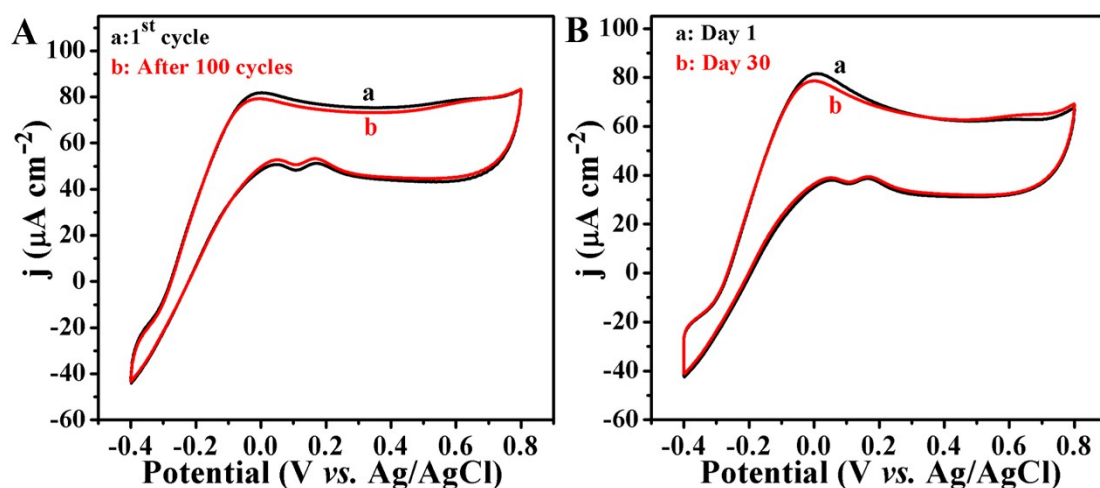

**Fig. S11** CVs of the PdNP/CoAL-LDHNW/ITO electrode in the presence of 0.5 mM hydrazine in 0.1 M phosphate buffer solution (pH 7.0) at  $100 \text{ mV s}^{-1}$ . (A) Before and after continuous 100 cycles; (B) Before and after 30 days storage at room temperature.

## References:

- 1 H. Meng, C. Wang, P. K. Shen and G. Wu, *Energy Environ. Sci.*, 2011, **4**, 1522–1526.
- 2 Q. Tang, Q. Zhang, P. Wang, Y. Wang and H. Wan, *Chem. Mater.*, 2004, **16**, 1967–1976.
- 3 R. Ma, J. Liang, K. Takada and T. Sasaki, *J. Am. Chem. Soc.*, 2011, **133**, 613–620.
